# Supplementary material
Source: Research Square preprint supplement (doi:10.21203/rs.3.rs-9222230/v1)
Supplement: Supplementary file 1 [file b3979fdd9afa3678db548aae.docx]

| **TABLE S1 |Baseline Clinicopathological Characteristics of Patients in the Training and Validation Cohorts** | | | | |
| --- | --- | --- | --- | --- |
| **Variables** | **Total (n=1354)** | **Training cohort (n=947)** | **Validation cohort (n=407)** | **P value** |
| **TB, μmol/L (Median, IQR)** | 13.8 (9.8, 25.87) | 13.8 (9.8, 26.45) | 14 (10, 25.2) | 0.735 |
| **DB, μmol/L (Median, IQR)** | 4.5 (2.8, 10.07) | 4.5 (2.8, 10.75) | 4.4 (2.7, 9.55) | 0.599 |
| **ALT, U/L (Median, IQR)** | 27.65 (15, 80) | 27 (15, 78.75) | 28 (16, 86) | 0.498 |
| **AST, U/L (Median, IQR)** | 26 (19, 60) | 26 (19, 60) | 26 (19, 60.15) | 0.916 |
| **ALP, U/L (Median, IQR)** | 109 (79, 194) | 111 (78, 191.75) | 107 (80.35, 195) | 0.765 |
| **GGT, U/L (Median, IQR)** | 51.05 (21, 201.5) | 50 (21, 206.5) | 51.1 (21.7, 180.1) | 0.994 |
| **BUN, mmol/L (Median, IQR)** | 4.7 (3.7, 5.9) | 4.8 (3.7, 5.9) | 4.5 (3.6, 6.05) | 0.452 |
| **INR (Median, IQR)** | 1 (0.94, 1.06) | 1 (0.94, 1.06) | 1 (0.93, 1.07) | 0.648 |
| **PT, s (Median, IQR)** | 11.8 (10.8, 13.1) | 11.8 (10.8, 13.1) | 11.8 (10.7, 13.2) | 0.743 |
| **APTT, s (Median, IQR)** | 30.55 (26.7, 34.77) | 30.5 (26.6, 34.8) | 30.6 (26.8, 34.7) | 0.868 |
| **FIB, g/L (Median, IQR)** | 3.58 (2.85, 4.5) | 3.57 (2.85, 4.51) | 3.58 (2.87, 4.5) | 0.821 |
| **NLR (Median, IQR)** | 4.43 (3.36, 5.82) | 4.46 (3.36, 5.8) | 4.41 (3.33, 5.89) | 0.92 |
| **PLR (Median, IQR)** | 154.98 (110.73, 222.38) | 152.3 (109.11, 221.53) | 157.78 (114.32, 223.73) | 0.3 |
| **LWR (Median, IQR)** | 0.22 (0.14, 0.31) | 0.22 (0.14, 0.3) | 0.22 (0.15, 0.33) | 0.248 |
| **NWR (Median, IQR)** | 0.98 (0.77, 1.18) | 0.97 (0.76, 1.17) | 0.99 (0.8, 1.2) | 0.251 |
| **LCR (Median, IQR)** | 0.13 (0.05, 0.35) | 0.13 (0.05, 0.34) | 0.13 (0.06, 0.38) | 0.875 |
| **CAR (Median, IQR)** | 0.28 (0.1, 0.63) | 0.28 (0.1, 0.63) | 0.28 (0.1, 0.63) | 0.561 |
| **SII (Median, IQR)** | 978.15 (650.95, 1447.93) | 970.5 (644.92, 1445.6) | 1018.98 (664.16, 1449) | 0.371 |
| **PNI (Median, IQR)** | 46.42 (42.17, 50.55) | 46.2 (41.9, 50.4) | 46.9 (42.67, 50.65) | 0.065 |
| **mGPS** |  |  |  | 0.719 |
| 0, n (%) | 736 (54) | 508 (54) | 228 (56) |  |
| 1, n (%) | 468 (35) | 333 (35) | 135 (33) |  |
| 2, n (%) | 150 (11) | 106 (11) | 44 (11) |  |
| **T stage** |  |  |  | 0.25 |
| T0, n (%) | 37 (3) | 29 (3) | 8 (2) |  |
| T1, n (%) | 227 (17) | 147 (16) | 80 (20) |  |
| T2, n (%) | 184 (14) | 135 (14) | 49 (12) |  |
| T3, n (%) | 851 (63) | 596 (63) | 255 (63) |  |
| T4, n (%) | 55 (4) | 40 (4) | 15 (4) |  |
| **N stage** |  |  |  | 0.958 |
| N0, n(%) | 714 (53) | 497 (52) | 217 (53) |  |
| N1, n (%) | 493 (36) | 347 (37) | 146 (36) |  |
| N2, n (%) | 147 (11) | 103 (11) | 44 (11) |  |
| **M stage** |  |  |  | 0.62 |
| 0, n (%) | 1298 (96) | 910 (96) | 388 (95) |  |
| 1, n (%) | 56 (4) | 37 (4) | 19 (5) |  |
| **Grade** |  |  |  | 0.799 |
| Well, n (%) | 593 (44) | 412 (44) | 181 (44) |  |
| Moderate, n (%) | 620 (46) | 433 (46) | 187 (46) |  |
| Poor, n (%) | 141 (10) | 102 (11) | 39 (10) |  |
